# Supplementary material for: The Association between Change in Lifestyle Behaviors and Mental Health Indicators in Immunosuppressed Individuals during the COVID-19 Pandemic
Source: MDPI journal article supplement (doi:10.3390/ijerph20032099), 2023-01-23
Supplement: s1 [file s1]

**Supplementary Table S1.** Continuous averages of lifestyle behaviors according to categorical measures <sup>a</sup>.

|                                           | MVPA <sup>b</sup> categories |                |                  |
|-------------------------------------------|------------------------------|----------------|------------------|
|                                           | Decrease (n= 43)             | Stable (n= 63) | Increase (n= 26) |
| MVPA before COVID (days/wk)               | 5.0 ± 1.9                    | 2.6 ± 3.1      | 3.3 ± 1.9        |
| MVPA past 7 days (days/wk)                | 2.0 ± 1.8                    | 3.2 ± 4.2      | 6.1 ± 2.3        |
| MVPA Difference (days/wk)                 | -3.0 ± 1.7                   | 0.0 ± 0.0      | 2.4 ± 1.6        |
| Sleep before COVID (min/day)              | 448.2 ± 61.1                 | 465.2 ± 71.2   | 465.5 ± 75.7     |
| Sleep past 7 days (min/day)               | 442.8 ± 103.5                | 465.5 ± 98.6   | 469.9 ± 77.3     |
| Sleep Difference (min/day)                | -5.4 ± 86.1                  | 0.3 ± 76.7     | 4.4 ± 78.7       |
| Sedentary Behavior before COVID (min/day) | 346.6 ± 242.5                | 379.5 ± 224.8  | 332.8 ± 231.8    |
| Sedentary Behavior past 7 days (min/day)  | 497.6 ± 245.3                | 442.1 ± 208.6  | 425.0 ± 273.8    |
| Sedentary Behavior Difference (min/day)   | 151.0 ± 142.5                | 62.6 ± 90.5    | 93.1 ± 145.0     |
|                                           | Sedentary categories         |                |                  |
|                                           | Decrease (n= 12)             | Stable (n= 30) | Increase (n= 90) |
| MVPA before COVID (days/wk)               | 3.7 ± 2.4                    | 3.5 ± 2.8      | 3.9 ± 2.6        |
| MVPA past 7 days (days/wk)                | 4.3 ± 3.7                    | 3.3 ± 3.3      | 3.1 ± 3.3        |
| MVPA Difference (days/wk)                 | 0.3 ± 3.2                    | -0.5 ± 1.20    | -1.1 ± 2.6       |
| Sleep before COVID (min/day)              | 467.3 ± 55.8                 | 432.9 ± 68.4   | 465.0 ± 67.9     |
| Sleep past 7 days (min/day)               | 478.8 ± 115.2                | 428.1 ± 75.2   | 463.1 ± 100.1    |
| Sleep Difference (min/day)                | 11.5 ± 102.9                 | -4.8 ± 40.1    | -2.0 ± 87.9      |
| Sedentary Behavior before COVID (min/day) | 538.2 ± 217.1                | 442.6 ± 255.4  | 303.0 ± 207.2    |
| Sedentary Behavior past 7 days (min/day)  | 449.3 ± 194.3                | 442.9 ± 255.2  | 471.4 ± 240.2    |
| Sedentary Behavior Difference (min/day)   | -88.9 ± 61.7                 | 0.3 ± 1.6      | 168.4 ± 110.4    |
|                                           | Sleep categories             |                |                  |
|                                           | Decrease (n= 44)             | Stable (n= 37) | Increase (n= 51) |
| MVPA before COVID (days/wk)               | 4.0 ± 2.6                    | 3.5 ± 2.5      | 3.8 ± 2.8        |
| MVPA past 7 days (days/wk)                | 3.3 ± 3.2                    | 2.7 ± 2.5      | 3.7 ± 3.9        |
| MVPA Difference (days/wk)                 | -0.9 ± 2.9                   | -0.8 ± 1.8     | -0.7 ± 2.5       |
| Sleep before COVID (min/day)              | 468.5 ± 66.9                 | 441.3 ± 59.6   | 460.8 ± 73.3     |
| Sleep past 7 days (min/day)               | 378.4 ± 79.5                 | 440.9 ± 59.6   | 535.3 ± 69.5     |
| Sleep Difference (min/day)                | -90.1 ± 53.6                 | -0.4 ± 1.7     | 74.5 ± 42.5      |
| Sedentary Behavior before COVID (min/day) | 329.0 ± 230.1                | 417.5 ± 277.1  | 335.0 ± 193.4    |
| Sedentary Behavior past 7 days (min/day)  | 460.2 ± 271.5                | 490.8 ± 27.0   | 445.0 ± 172.3    |
| Sedentary Behavior Difference (min/day)   | 131.2 ± 145.2                | 73.3 ± 126.3   | 110.0 ± 120.0    |

**Supplementary Table S2.** Associations between changes in lifestyle behaviors on mental health indicators in the subsample restricted to immunosuppressed individuals ( $n = 108$ ).

|                       | Stress        |                    |              | Distress      |                      |              | Resilience    |             |       | Anxiety Symptoms |                    |              | Depressive Symptoms |                    |              |
|-----------------------|---------------|--------------------|--------------|---------------|----------------------|--------------|---------------|-------------|-------|------------------|--------------------|--------------|---------------------|--------------------|--------------|
|                       | $\hat{\beta}$ | 95%CI              | $p^a$        | $\hat{\beta}$ | 95%CI                | $p^a$        | $\hat{\beta}$ | 95%CI       | $p^a$ | $\hat{\beta}$    | 95%CI              | $p^a$        | $\hat{\beta}$       | 95%CI              | $p^a$        |
| <b>MVPA</b>           |               |                    |              |               |                      |              |               |             |       |                  |                    |              |                     |                    |              |
| Stable (n=53)         | ref           |                    |              | ref           |                      |              | ref           |             |       | ref              |                    |              | ref                 |                    |              |
| Increase (n=19)       | -0.01         | ---0.47, 0.45      | 0.96         | 4.42          | -7.89, 16.73         | 0.48         | 1.62          | -1.14, 4.38 | 0.25  | 0.96             | -1.49, 3.42        | 0.44         | 0.63                | -2.15, 3.41        | 0.65         |
| Decrease (n=36)       | 0.16          | - -0.21, 0.54      | 0.38         | <b>13.04</b>  | <b>3.08, 22.98</b>   | <b>0.01</b>  | -0.72         | -2.96, 1.51 | 0.52  | <b>3.13</b>      | <b>-1.15, 5.12</b> | <b>0.002</b> | <b>3.09</b>         | <b>0.85, 5.34</b>  | <b>0.007</b> |
| <b>Sedentary time</b> |               |                    |              |               |                      |              |               |             |       |                  |                    |              |                     |                    |              |
| Stable (n=26)         | ref           |                    |              | ref           |                      |              | ref           |             |       | ref              |                    |              | ref                 |                    |              |
| Increase (n=71)       | <b>0.46</b>   | <b>0.04, 0.89</b>  | <b>0.03</b>  | <b>15.59</b>  | <b>4.21, 26.99</b>   | <b>0.008</b> | -0.49         | -3.10, 2.12 | 0.71  | <b>2.43</b>      | <b>0.09, 4.79</b>  | <b>0.04</b>  | <b>2.58</b>         | <b>-0.05, 5.22</b> | <b>0.05</b>  |
| Decrease (n=11)       | <b>0.27</b>   | <b>-0.35, 0.89</b> | <b>0.38</b>  | <b>2.33</b>   | <b>-14.36, 19.01</b> | <b>0.78</b>  | -0.39         | -4.21, 3.44 | 0.84  | 0.48             | -2.96, 3.92        | 0.78         | 0.28                | -3.58, 4.14        | 0.88         |
| <b>Sleep duration</b> |               |                    |              |               |                      |              |               |             |       |                  |                    |              |                     |                    |              |
| Stable (n=29)         | ref           |                    |              | ref           |                      |              | ref           |             |       | ref              |                    |              | ref                 |                    |              |
| Increase (n=41)       | <b>0.54</b>   | <b>0.12, 0.96</b>  | <b>0.01</b>  | <b>17.58</b>  | <b>6.09, 29.05</b>   | <b>0.003</b> | -1.86         | -4.48, 0.73 | 0.16  | <b>2.53</b>      | <b>0.16, 4.90</b>  | <b>0.03</b>  | <b>3.53</b>         | <b>0.91, 6.15</b>  | <b>0.008</b> |
| Decrease (n=38)       | <b>0.62</b>   | <b>0.19, 1.05</b>  | <b>0.005</b> | <b>13.54</b>  | <b>1.74, 25.35</b>   | <b>0.02</b>  | -0.62         | -3.30, 2.06 | 0.65  | <b>2.40</b>      | <b>-0.03, 4.85</b> | <b>0.05</b>  | <b>3.24</b>         | <b>0.55, 5.93</b>  | <b>0.02</b>  |

<sup>a</sup> p value adjusted for age, sex, and physical illness diagnosis.

<sup>b</sup>MVPA = Moderate-to-vigorous physical activity.

**Bold** indicate statistically significant results at  $p < 0.05$ .
